# Supplementary material
Source: publisher figshare collection journal article supplement (https://acs.figshare.com/ndownloader/files/3948976)
Supplement: Supplementary file 1 [file 3948976]

# **Orientational Order of Two Fluoro- and Isothiocyanate-Substituted Nematogens by Combination of $^{13}\text{C}$ NMR Spectroscopy and DFT Calculations**

*Lucia Calucci,<sup>a,\*</sup> Elisa Carignani,<sup>b</sup> Marco Geppi,<sup>b,\*</sup> Sara Macchi,<sup>b</sup> Benedetta Mennucci,<sup>b</sup> Stanislaw Urban<sup>c</sup>*

<sup>a</sup> Istituto di Chimica dei Composti OrganoMetallici, Consiglio Nazionale delle Ricerche – CNR, via G. Moruzzi 1, 56124, Pisa.

<sup>b</sup> Dipartimento di Chimica e Chimica Industriale, Università di Pisa, via Risorgimento 35, 56126, Pisa, Italy.

<sup>c</sup> Institute of Physics, Jagellonian University, Reymonta 4, 30-059 Kraków, Poland.

## 1. Comparison of NMR data calculated by M06-2X and B3LYP functionals

We performed in vacuo NMR calculations using B3LYP and M06-2X functionals and 6-311+G(d,p) basis set (Figure S1). Both sets of calculations satisfactorily reproduce the experimental  $^{13}\text{C}$  isotropic chemical shifts. The root mean square deviation (RMS) between experimental and computed data is 5.7 and 6.7 ppm for B3LYP and M06-2X functional, respectively; the B3LYP functional was selected for all the following NMR calculations.

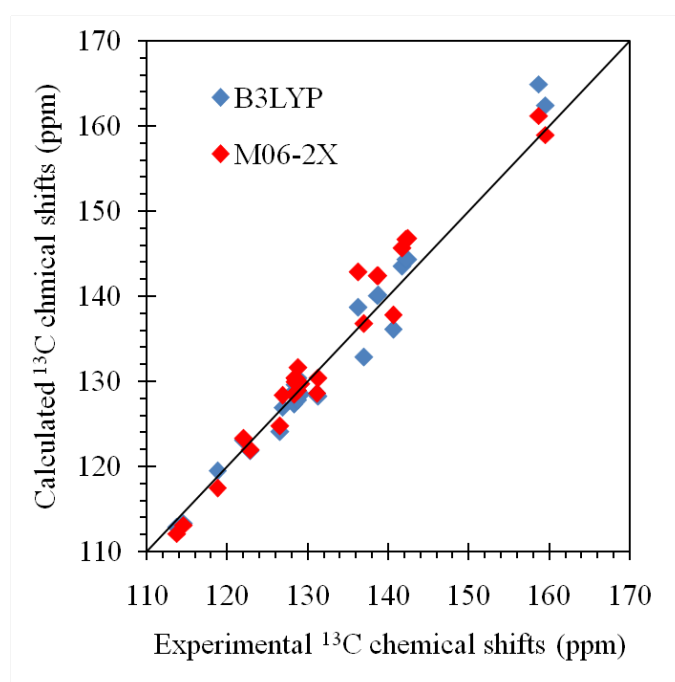

**Figure S1.** Correlation of experimental and calculated  $^{13}\text{C}$  NMR chemical shifts (ppm) at B3LYP and M06-2X levels of theory for the two mesogens.

## 2. Conformational analysis by Potential Energy Surface scan

In order to evaluate the conformational effects on NMR parameters we performed a relaxed Potential Energy Surface (PES) scan along the  $\tau(\text{C4-C5-C8-C9})$  dihedral angle (Figure S2) for both the molecules in the gas-phase.

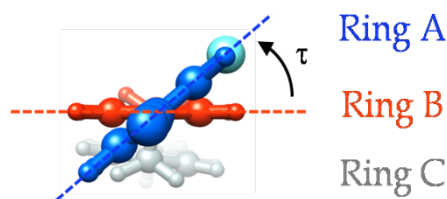

**Figure S2.** Schematic representation of  $\tau(\text{C4-C5-C8-C9})$  angle.

For this purpose we used M06-2X functional and 6-31G(d) basis set, and we varied the  $\tau$  angle between 0 and 360 degrees with steps of 10 degrees. Figures S3 and S4 show the energy profiles for **ORTHO** and **META**, respectively. We found four minima differing by less than 0.04 and 0.06 Kcal/mol for **ORTHO** and **META**, respectively.  $^{13}\text{C}$  isotropic chemical shifts calculated for the different conformers differed by less than 1.3 ppm and 1 ppm for **ORTHO** and **META**, respectively, with respect to the absolute minimum (minimum number 4 in figures S3 and S4).

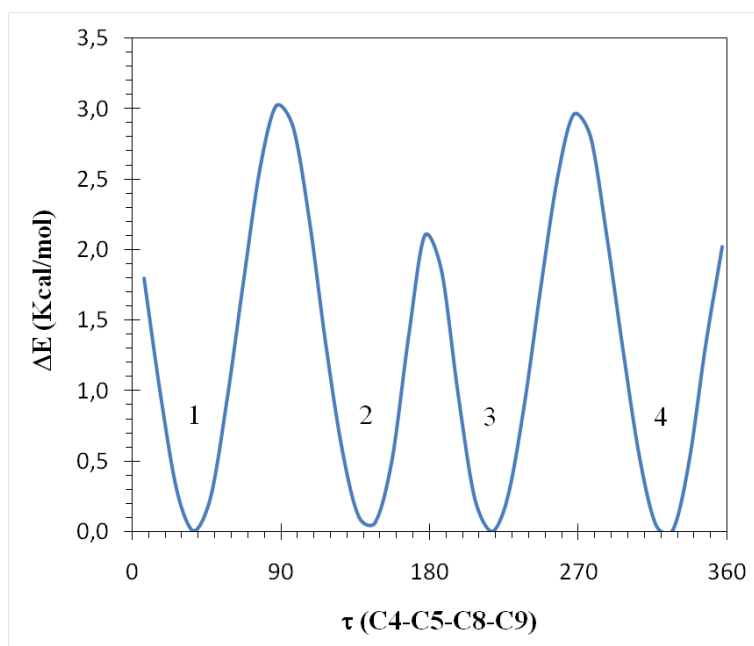

**Figure S3.** Potential Energy Surface (PES) scan along the  $\tau(\text{C4-C5-C8-C9})$  dihedral angle for **ORTHO** molecule. On y axis the differences of energy are represented with respect to the energy of the absolute minimum conformation (minimum number 4).

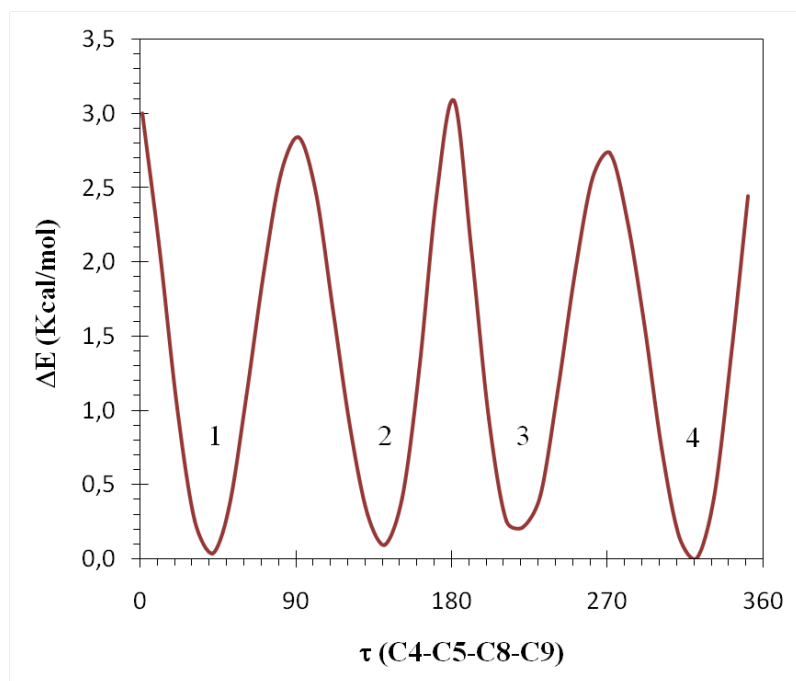

**Figure S4.** Potential Energy Surface (PES) scan along the  $\tau$ (C4-C5-C8-C9) dihedral angle for **META** molecule. On y axis the differences of energy are represented with respect to the energy of the absolute minimum conformation (minimum number 4).

### 3. Temperature dependence of $^{13}\text{C}$ NMR spectra of ORTHO and META in the N phase

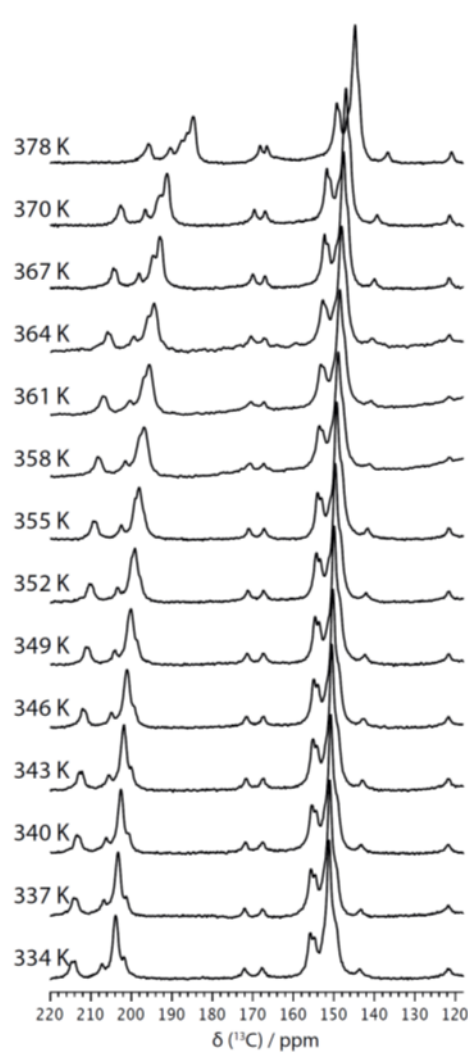

**Figure S5.** Temperature dependence of the aromatic region of the  $^{13}\text{C}$  DE NMR spectra of **ORTHO** within the N phase.

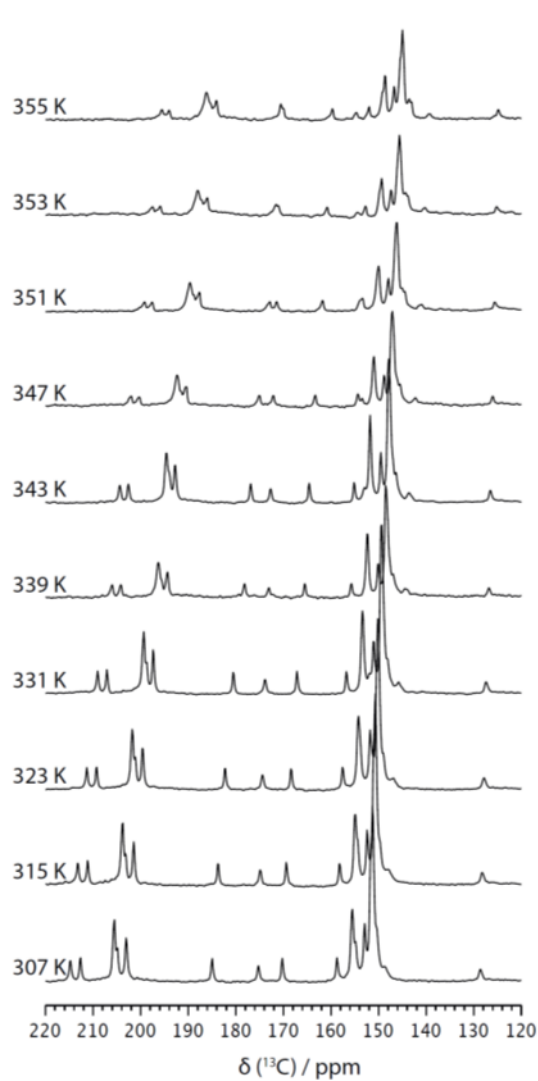

**Figure S6.** Temperature dependence of the aromatic region of the  $^{13}\text{C}$  DE NMR spectra of **META** within the N phase.
